# Supplementary material for: Aberrantly Expressed MicroRNAs in Cancer-Associated Fibroblasts and Their Target Oncogenic Signatures in Hepatocellular Carcinoma
Source: MDPI journal article supplement (doi:10.3390/ijms24054272), 2023-02-21

## Supporting Information

**Table S1.** The binding probability of miRs to *TGFBRI* mRNA were predicted by TargetScan 8.0

| miRNAs                | Position in the 3'-UTR | Seed match | Context++ score | Predicted relative KD |
|-----------------------|------------------------|------------|-----------------|-----------------------|
| <i>hsa-miR-101-3p</i> | 460-466                | 7mer-m8    | -0.29           | -3.849                |
|                       | 3993-4000              | 8mer       | -0.24           | -3.714                |
| <i>hsa-miR-490-3p</i> | 3933-3939              | 7mer-m8    | -0.17           | -3.435                |

**Table S2.** Primer sequences.

| Gene                  |         | Sequence                        |
|-----------------------|---------|---------------------------------|
| <i>hsa-miR-101-3p</i> |         | 5'-TACAGTACTGTGATAACTGAA-3'     |
| <i>hsa-miR-490-3p</i> |         | 5'-CAACCTGGAGGACTCCATGCTG -3'   |
| <i>TGFBR1</i>         | Forward | 5'-GGGGATGGGGGAAATACGAC-3'      |
|                       | Reverse | 5'-CCAGAGCAGCCTTCAGTCAA-3'      |
| <i>HMBS</i>           | Forward | 5'- GGAGGGCAGAAGGAAGAAAACAG -3' |
|                       | Reverse | 5'-CACTGTCCGTCTGTATGCGAG-3'     |
| <i>GAPDH</i>          | Forward | 5'-AGTATGACAACAGCCTCAAG-3'      |
|                       | Reverse | 5'-TCATGAGTCCTTCCACGATA-3'      |

**Figure S1. The qRT-PCR results of two miRs**

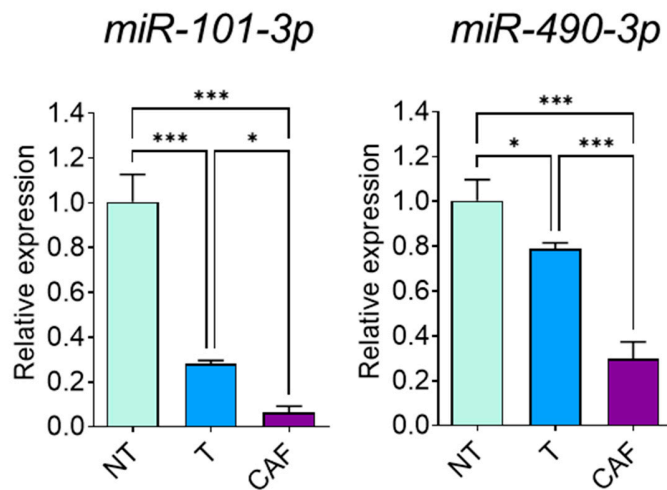

**Figure S2. Confirmation of mycoplasma-free cultures in this study**

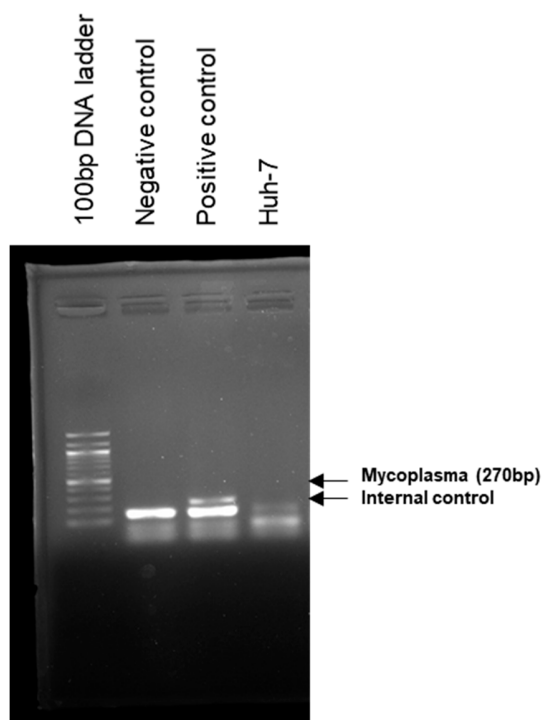

Supplement: s1 [file s1]
